# Supplementary material
Source: Royal Society of Chemistry journal article supplement (doi:10.1039/d6tc00058d)
Supplement: d6tc00058d1.pdf [file d6tc00058d1.pdf]

## Supplementary information

### Tailoring Microwave Dielectric Properties through High-Entropy Strategy in Spinel-type Titanium Ceramics

Linqiao Zhang<sup>a,#</sup>, Pingwen Xiang<sup>a,#</sup>, Yuanming Lai<sup>a,b,\*</sup>, Feng Liu<sup>a</sup>, Yuanxun Li<sup>b,c,d</sup>, Fangyi Huang<sup>e</sup>,  
Jiao Han<sup>f</sup>, Yiming Zeng<sup>f</sup>, Qian Liu<sup>a</sup>, Chongsheng Wu<sup>a</sup>

<sup>a</sup> School of Mechanical and Electrical Engineering, Chengdu University of Technology, Chengdu 610059, China

<sup>b</sup> State Key Laboratory of Electronic Thin Films and Integrated Devices, University of Electronic Science and Technology of China, Chengdu 610054, China

<sup>c</sup> Chengdu Hongke Electronic Technology Co., Ltd, Chengdu 500643, China

<sup>d</sup> Ganzhou Yanchuang Electronic Technology Co., Ltd, Ganzhou, 341000, China

<sup>e</sup> Key Laboratory of New Processing Technology for Nonferrous Metal and Materials, Ministry of Education, Guangxi Key Laboratory of Optical and Electronic Materials and Devices, Guilin University of Technology, 541004, Guilin, China

<sup>f</sup> Yunnan Precious Metals Lab Co.,LTD, Kunming 650106, China

The bulk density of the high-entropy MZLCNT ceramics was measured via the Archimedes method. The theoretical density of the crystalline phase, denoted as  $\rho_{\text{theo}}$ , was calculated in accordance with equation (1)[1]:

$$\rho_{\text{theo}} = \frac{ZA}{VcN_A} \quad (1)$$

Here  $Z$  is the number of molecules in  $A$  unit cell,  $A$  is the molar molecular weight,  $Vc$  is the volume of a unit cell, and  $N_A$  is Avogadro's constant.

The relative density ( $\rho_{\text{relative}}$ ) was used to evaluate the densification of the ceramics, which can be calculated by using the following equation (2):

$$\rho_{\text{relative}} = \frac{\rho_{\text{bulk}}}{\rho_{\text{theo}}} \quad (2)$$

The  $\rho_{\text{bulk}}$  and  $\rho_{\text{theo}}$  represent bulk density and theoretical density respectively.

---

# These authors contributed equally to this work.

\* Corresponding author: [laiyuanming19@cdu.edu.cn](mailto:laiyuanming19@cdu.edu.cn)

**Table S1.** The bulk density, theoretical density, and relative density of high-entropy MZLCNT ceramics.

| $x$ value                           | 0.0   | 0.1   | 0.2   | 0.3   | 0.4   |
|-------------------------------------|-------|-------|-------|-------|-------|
| $P_{\text{bulk}}(\text{g/cm}^3)$    | 4.283 | 4.177 | 4.073 | 3.964 | 3.910 |
| $\rho_{\text{theo}}(\text{g/cm}^3)$ | 4.398 | 4.280 | 4.161 | 4.044 | 3.985 |
| $\rho_{\text{relative}}(\%)$        | 97.4  | 97.6  | 97.9  | 98.0  | 98.1  |

**Table S2.** The oxygen vacancy content of high-entropy MZLCNT ceramics

| Parameter                          | $x = 0.0$ | $x = 0.2$ | $x = 0.4$ |
|------------------------------------|-----------|-----------|-----------|
| Ti <sup>3+</sup> 2p <sub>3/2</sub> | 45448     | 41174     | 29854     |
| Ti <sup>4+</sup> 2p <sub>3/2</sub> | 55983     | 62439     | 73685     |
| $\delta$ (%)                       | 22.4      | 19.8      | 14.4      |

The ionicity ( $f_i$ ) of the chemical bond  $\mu$  in high-entropy MZLCNT ceramics are computed by the following equation:

$$f_i^\mu = \frac{(C^\mu)^2}{(E_g^\mu)^2} \quad (3)$$

$$(E_g^\mu)^2 = (E_h^\mu)^2 + (C^\mu)^2 \quad (4)$$

$$E_h^\mu = \frac{39.74}{(d^\mu)^{2.48}} \quad (5)$$

$$C^\mu = 14.4b^\mu e^{(-k_s^\mu r_o^\mu)} \left[ \frac{(Z_A^\mu)^*}{r_o^\mu} - \frac{n}{m} \frac{(Z_B^\mu)^*}{r_o^\mu} \right], n \geq m \quad (6)$$

Where  $E_g^\mu$  represents the average energy gap between molecular orbitals and antibonding molecular orbitals,  $E_h^\mu$  and  $C^\mu$  are respectively the homogeneous and heteropolar components of the energy gap.  $d^\mu$  refers to the bond length of the  $\mu$  bond, and  $b^\mu$  is the correction factor. The  $e^{(-k_s^\mu r_o^\mu)}$  is the Thomas Fermi shielding factor,  $(Z_A^\mu)^*$ , and  $(Z_B^\mu)^*$  indicate the number of effective valence electrons of A and B.

The lattice energy of different chemical bonds in high-entropy MZLCNT ceramics, calculated using follow equation:

$$U = \sum_{\mu} (U_{bc}^{\mu} + U_{bi}^{\mu}) \quad (7)$$

$$U_{bc}^{\mu} = 2100m \frac{(Z_{+}^{\mu})^{1.64}}{(d^{\mu})^{0.75}} f_c^{\mu} \quad (8)$$

$$U_{bi}^{\mu} = 1270 \frac{(m+n)Z_{+}^{\mu}Z_{-}^{\mu}}{d^{\mu}} \left(1 - \frac{0.4}{d^{\mu}}\right) f_i^{\mu} \quad (9)$$

Where  $U_{bi}^{\mu}$  and  $U_{bc}^{\mu}$  represent the lattice energies contributed by ions and covalent contributions respectively.  $Z_{+}^{\mu}$  and  $Z_{-}^{\mu}$  indicate the bond valence of the cation and anion in the chemical bond  $\mu$ .

**Table. S3** The bond length, ionicity ( $f_i$ ), covalency ( $f_c$ ) and lattice energy of different bond in high-entropy MZLCNT ceramics.

| $x$ value | Bond type | Bond length (Å) | $f_i$ (%) | $f_c$ (%) | Lattice energy (kJ/mol) |
|-----------|-----------|-----------------|-----------|-----------|-------------------------|
| 0.0       | A(1)-O    | 1.90            | 62.55     | 37.45     | 2329                    |
|           | A(2)-O    | 2.17            | 64.76     | 35.24     | 1920                    |
|           | Ti-O      | 2.17            | 89.14     | 10.86     | 7649                    |
| 0.1       | A(1)-O    | 1.84            | 60.64     | 39.36     | 2211                    |
|           | A(2)-O    | 2.10            | 63.28     | 36.72     | 1971                    |
|           | Ti-O      | 2.10            | 85.74     | 14.26     | 7855                    |
| 0.2       | A(1)-O    | 1.83            | 62.44     | 37.56     | 2204                    |
|           | A(2)-O    | 2.09            | 65.97     | 34.03     | 1974                    |
|           | Ti-O      | 2.09            | 85.48     | 14.52     | 7865                    |
| 0.3       | A(1)-O    | 1.87            | 68.44     | 31.56     | 2170                    |
|           | A(2)-O    | 2.08            | 67.36     | 32.64     | 1989                    |
|           | Ti-O      | 2.08            | 84.25     | 15.75     | 7925                    |
| 0.4       | A(1)-O    | 1.92            | 74.73     | 25.27     | 2130                    |
|           | A(2)-O    | 2.05            | 75.52     | 24.48     | 2010                    |
|           | Ti-O      | 2.05            | 82.57     | 17.43     | 8005                    |

The lattice distortion ( $\mathcal{E}^{W-H}$ ) of high-entropy MZLCNT ceramics can be calculated by the following equation:

$$\mathcal{E}^{W-H} = \frac{\beta_{hkl}}{4\tan(\theta_{hkl})} \quad (10)$$

Where  $\mathcal{E}^{W-H}$ ,  $\beta_{hkl}$ , and  $\theta_{hkl}$  represent the lattice distortion, full width at half of the maximum and diffraction angle.

**Table S4.** The lattice distortion of high-entropy MZLCNT ceramics with  $x = 0.0-0.4$ .

| $x$ value | $\Delta S_{config}$ | Peak position ( $2\theta_{hkl}$ )/ $\beta_{hkl}$ |                  |                  |                  |                  |                  |                  | $\mathcal{E}^{W-H}$<br>(%) |
|-----------|---------------------|--------------------------------------------------|------------------|------------------|------------------|------------------|------------------|------------------|----------------------------|
|           |                     | Peak 1                                           | Peak 2           | Peak 3           | Peak 4           | Peak 5           | Peak 6           | Peak 7           |                            |
| 0.0       | 1.09R               | 18.256/<br>0.116                                 | 30.016/<br>0.097 | 35.338/<br>0.100 | 42.955/<br>0.101 | 53.276/<br>0.095 | 56.782/<br>0.105 | 62.343/<br>0.105 | 1.858                      |
| 0.1       | 1.38R               | 18.244/<br>0.120                                 | 30.015/<br>0.100 | 35.342/<br>0.100 | 42.955/<br>0.108 | 53.277/<br>0.096 | 56.783/<br>0.103 | 62.356/<br>0.109 | 1.621                      |
| 0.2       | 1.52R               | 18.261/<br>0.112                                 | 30.020/<br>0.104 | 32.358/<br>0.104 | 42.961/<br>0.111 | 53.284/<br>0.100 | 56.800/<br>0.108 | 62.363/<br>0.113 | 1.034                      |
| 0.3       | 1.58R               | 18.259/<br>0.109                                 | 30.018/<br>0.098 | 35.356/<br>0.103 | 42.959/<br>0.095 | 52.281/<br>0.097 | 56.798/<br>0.098 | 62.362/<br>0.111 | 1.110                      |
| 0.4       | 1.61R               | 18.256/<br>0.131                                 | 30.017/<br>0.091 | 35.354/<br>0.099 | 42.957/<br>0.094 | 53.280/<br>0.094 | 56.797/<br>0.095 | 62.359/<br>0.090 | 2.327                      |

The bond strength of the A(1)-O bond in the high-entropy MZLCNT ceramic [AO<sub>4</sub>] tetrahedron is calculated by equation (11)[2]:

$$S = S_0 \left( \frac{R_i}{R_0} \right)^{-N} \quad (11)$$

where  $R_i$  is the average A-O bond length in the [AO<sub>4</sub>] tetrahedra, with  $N$  and  $R_0$  representing empirical constants defined by the cation site and cation-anion pair.

## Reference

- [1] Y.B. Guo, J.T. Ma, J.X. Zhao, K. Du, Z.T. Fang, Y.Q. Zheng, W.Z. Lu, W. Lei, Low-temperature sintering and microwave dielectric properties of

CaSn<sub>x</sub>SiO<sub>(3+2x)</sub>-based positive  $\tau_f$  compensator, *Ceram Int* 44 (2018) 18209–18212. <https://doi.org/10.1016/j.ceramint.2018.07.029>.

- [2] I.D. Brown, R.D. Shannon, Empirical Bond-Strength-Bond-Length Curves for Oxides, 1973.
